# Supplementary material
Source: publisher figshare collection journal article supplement (https://acs.figshare.com/ndownloader/files/6780048)
Supplement: Supplementary file 1 [file 6780048]

# Supporting Information

## ASSOCIATED CONTENT Supporting Info Figures

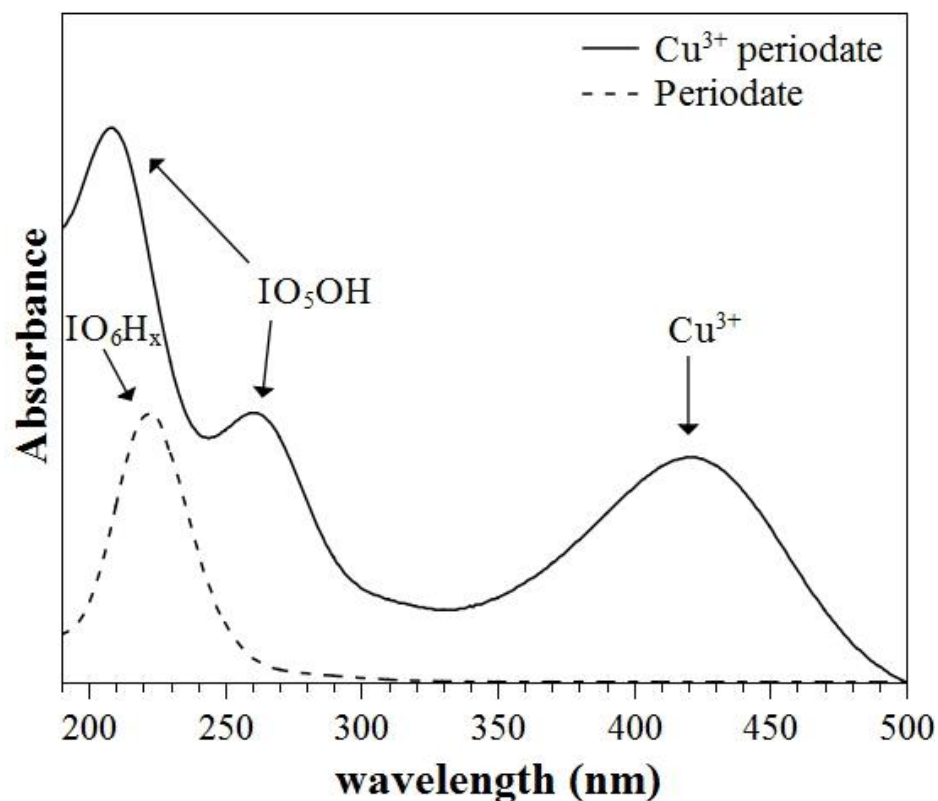

**SI Figure 1:** Characteristic spectra of  $\text{Cu}^{3+}$  periodate in 18 MΩ  $\text{H}_2\text{O}$ . Peaks match those listed in literature as  $\text{Cu}^{3+}$  at 420 nm and complexed periodate at 261 and 210 nm (solid line).<sup>1,2</sup> Sodium periodate is presented (dashed line) as an uncomplexed ligand in 18 MΩ  $\text{H}_2\text{O}$  for reference. The shift in free periodate to higher wavelength (lower energy) indicates a ligand to metal charge transfer.

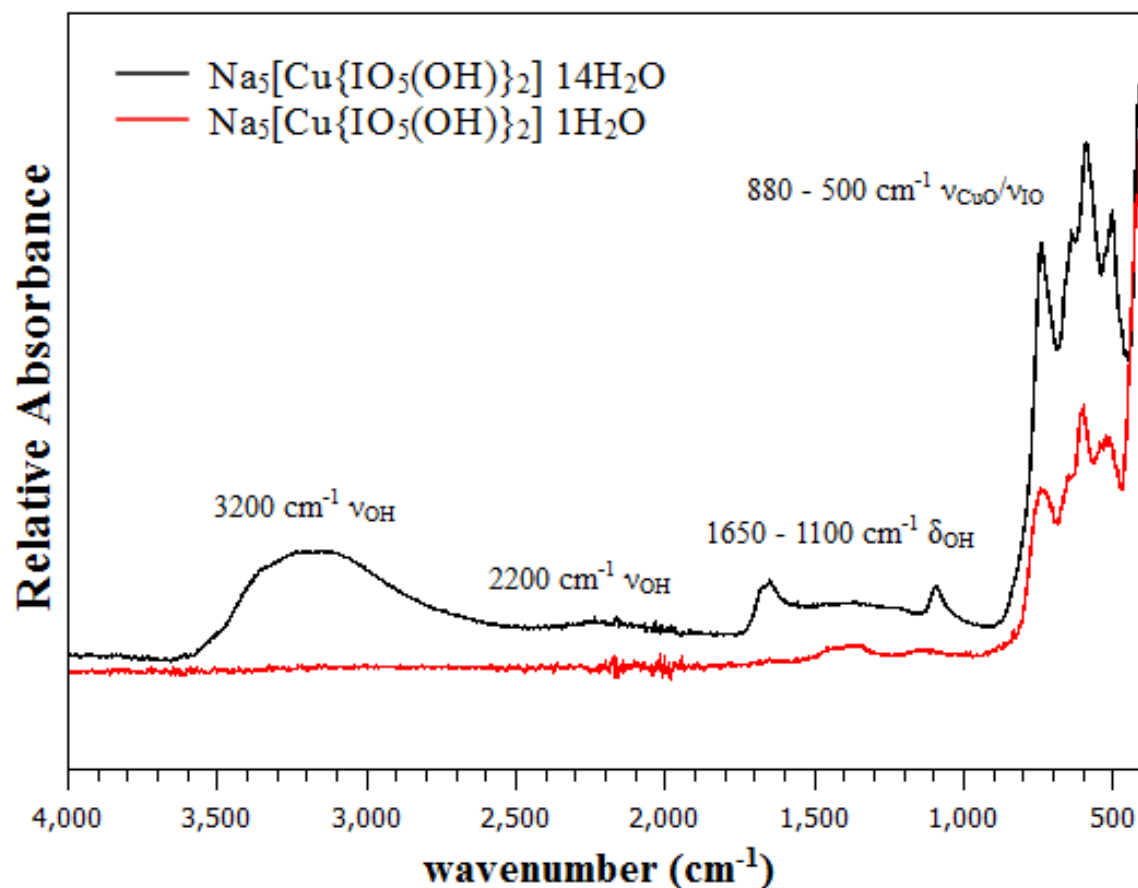

**SI Figure 2:** FTIR of  $\text{Cu}^{3+}$  periodate with 7.1% Cu ( $\text{Na}_5[\text{Cu}\{\text{IO}_5(\text{OH})\}_2] \cdot 14\text{H}_2\text{O}$  7.37% Cu) (black) and 9.86% Cu ( $\text{Na}_5[\text{Cu}\{\text{IO}_5(\text{OH})\}_2] \cdot 1\text{H}_2\text{O}$  9.86% Cu) (red). The spectra show characteristic peaks of  $\text{Cu}^{3+}$  complexed with periodate indicated by the metal-iodine-oxygen stretches between 800 and 400 wavenumbers.<sup>3</sup> There is a noticeable lack of OH peaks at  $3200 \text{ cm}^{-1}$  in the 9.86% Cu complex, and indicates very little to no water is present in the crystal structure. However, OH bending vibrations are still present at lower wavelengths due to the presence of I-OH in the metal complex.

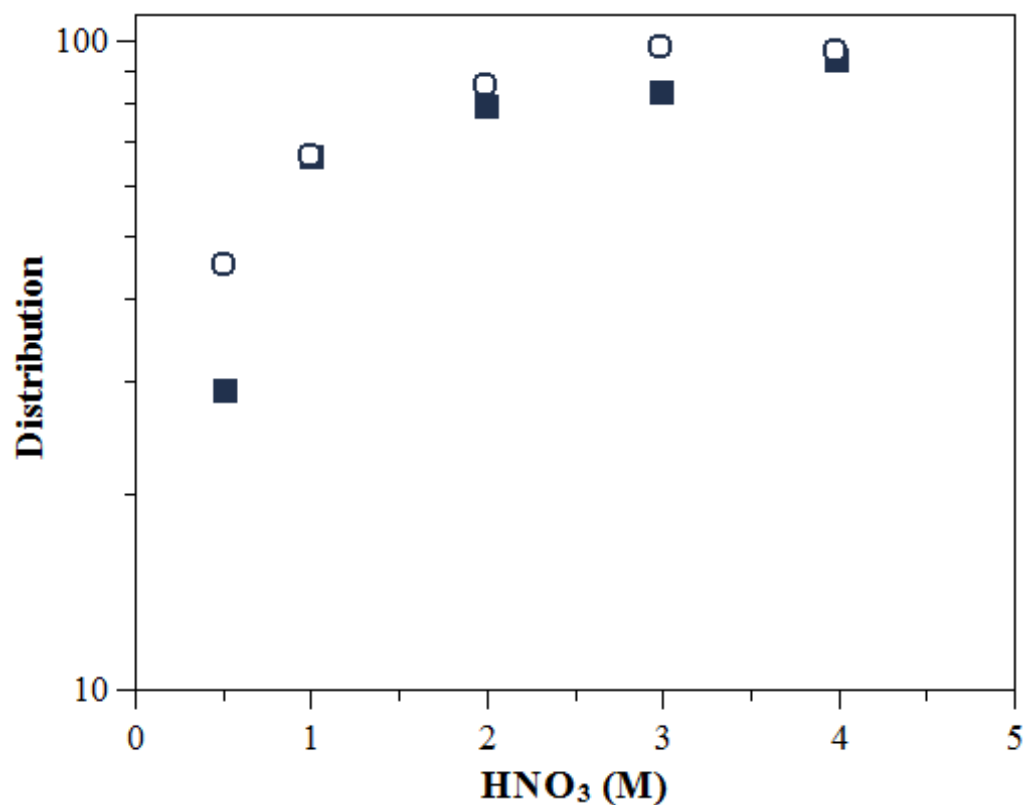

**SI Figure 3:** Distribution of  $^{233}\text{U}$  from 0.5 M to 5 M  $\text{HNO}_3$  and 1 M DAAP in n-dodecane in the presence (square) and absence (circle) of  $\text{Cu}^{3+}$  periodate. For the extraction, 500  $\mu\text{L}$  of optima nitric acid solution as added to 20 mg of  $\text{Cu}^{3+}$  periodate followed by 500  $\mu\text{L}$  of 1 M DAAP in n-dodecane. The vial was shaken for 5 seconds followed by a 30 second centrifuge. Each phase was counted using a Packard Tri-Carb 2500 Liquid Scintillation Counter. Values are reported as mean of triplicate samples with less than 15% relative standard deviation.

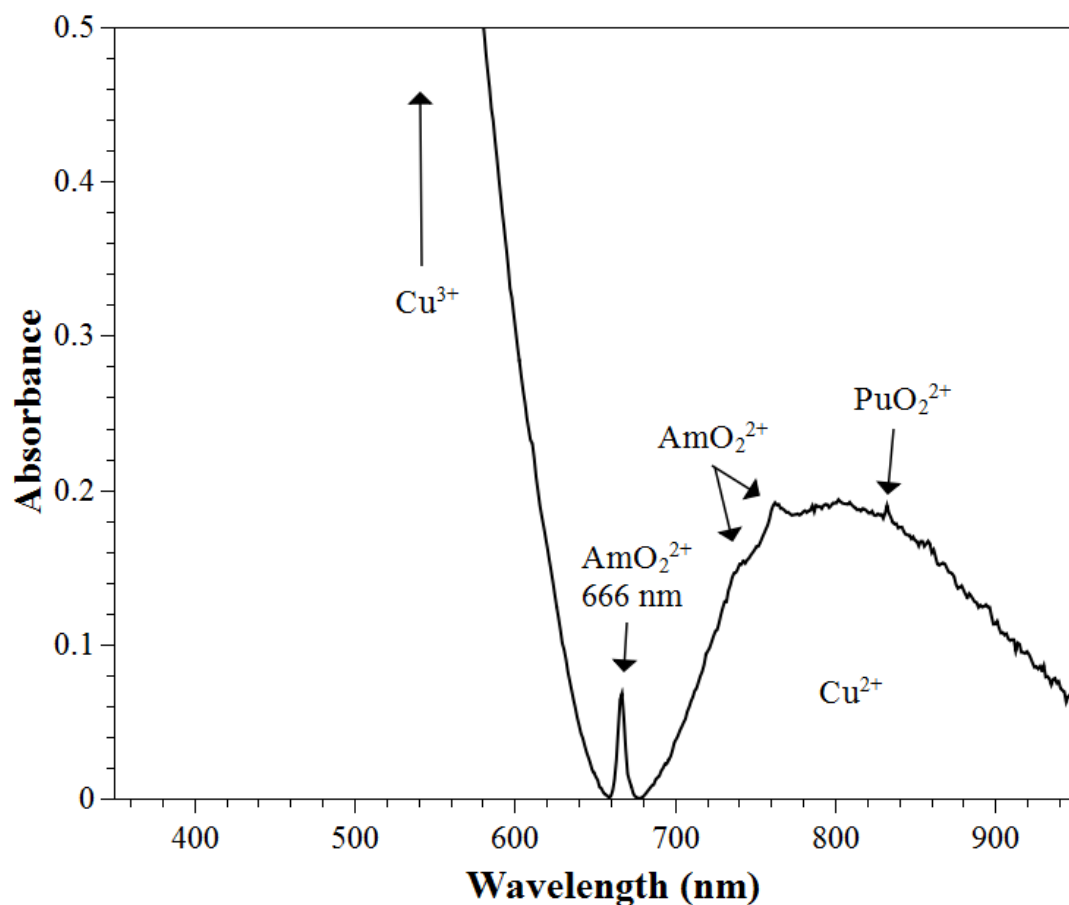

**SI Figure 4:** UV-Visible spectrum of 3.0 mM Am in 1 M HNO<sub>3</sub> with 20 mg of Cu<sup>3+</sup> periodate. Due to <sup>241</sup>Am high specific activity, <sup>243</sup>Am was used for the UV-Vis analysis, and the spectrum was collected using a Spectral 420 CCD Array UV-Vis Spectrometer. The sharp peak at 666 nm is indicative of AmO<sub>2</sub><sup>2+</sup>. The Cu<sup>3+</sup> periodate is present as indicated by the large shoulder below 660 nm. The spectrum is consistent with spectra presented by Sinkov et. al.<sup>4</sup>

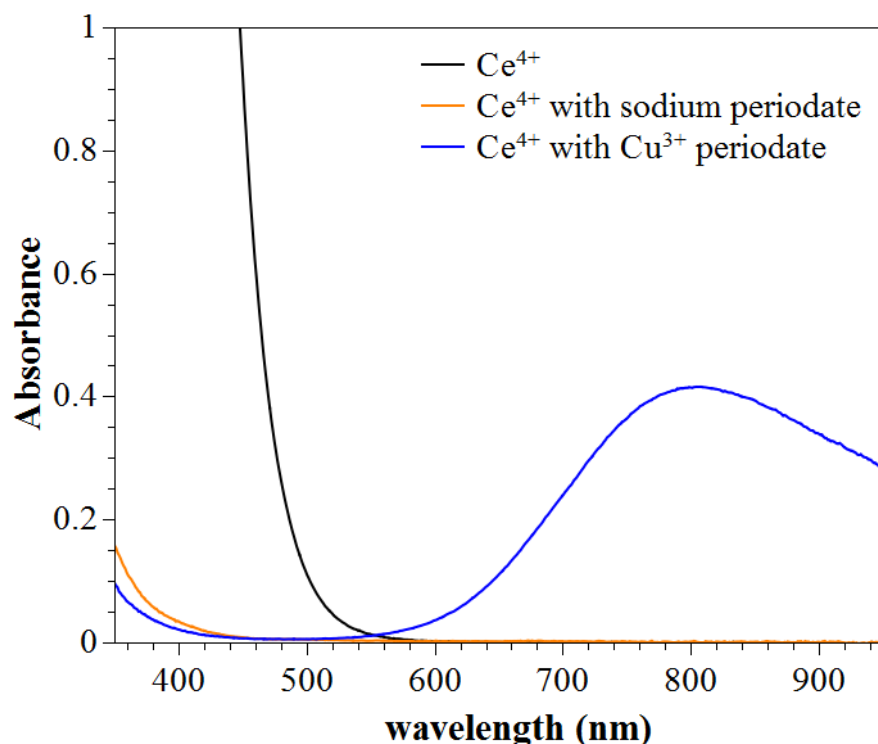

**SI Figure 5:** The UV-Vis spectra of 15 mM  $\text{H}_2\text{Ce}(\text{NO}_3)_6$  in 3 M  $\text{HNO}_3$  (black). Addition of 20 mg  $\text{Cu}^{3+}$  periodate caused a light yellow to white precipitate to form. The solution was centrifuged prior to recollecting a UV-Vis spectra. The results show the amount of  $\text{Ce}^{4+}$  dropped significantly, and there was an ingrowth of  $\text{Cu}^{2+}$  from reduction of  $\text{Cu}^{3+}$  (blue). Similarly, addition of 20 mg sodium periodate resulted precipitate formation and a decrease of the  $\text{Ce}^{4+}$  signal in the UV-Vis spectrum (orange).

#### References:

- (1) Balikungeri, A.; Pelletier, M.; Monnier, D. Contribution to the Study of the Complexes Bis (dihydrogen Tellurato) cuprate(III) and Argentate (III), Bis (hydrogen Periodato) Cuprate (III) and Argentate (III). *Inorganica Chim. Acta* **1977**, 22, 7–14.
- (2) Balikungeri, A.; Pelletier, M. Electronic Spectra of Bis (dihydrogen Tellurato) and Bis (hydrogen Periodato) Complexes of Copper (III), Silver (III) and Gold (III). *Inorganica Chim. Acta* **1978**, 29, 141–148.
- (3) Dengel, A. C.; Griffith, W. P.; Mostafa, S. I.; White, A. J. . Raman and Infrared Study of Some Metal Periodato Complexes. *Spectrochim. Acta Part A Mol. Spectrosc.* **1993**, 49 (11), 1583–1589.
- (4) Sinkov, S. I.; Lumetta, G. J. Americium(III) Oxidation by copper(III) Periodate in Nitric Acid Solution as Compared with the Action of Bi(V) Compounds of Sodium, Lithium, and Potassium. *Radiochim. Acta* **2015**, 103 (8), 541–552.
